# Supplementary material
Source: publisher site journal article supplement (https://www.dovepress.com/article/supplementary_file/613375/613375%20Supplementary%20Material.docx)
Supplement: Supplementary file 1 [file 613375%20Supplementary%20Material.docx]

**Supplementary Materials:**


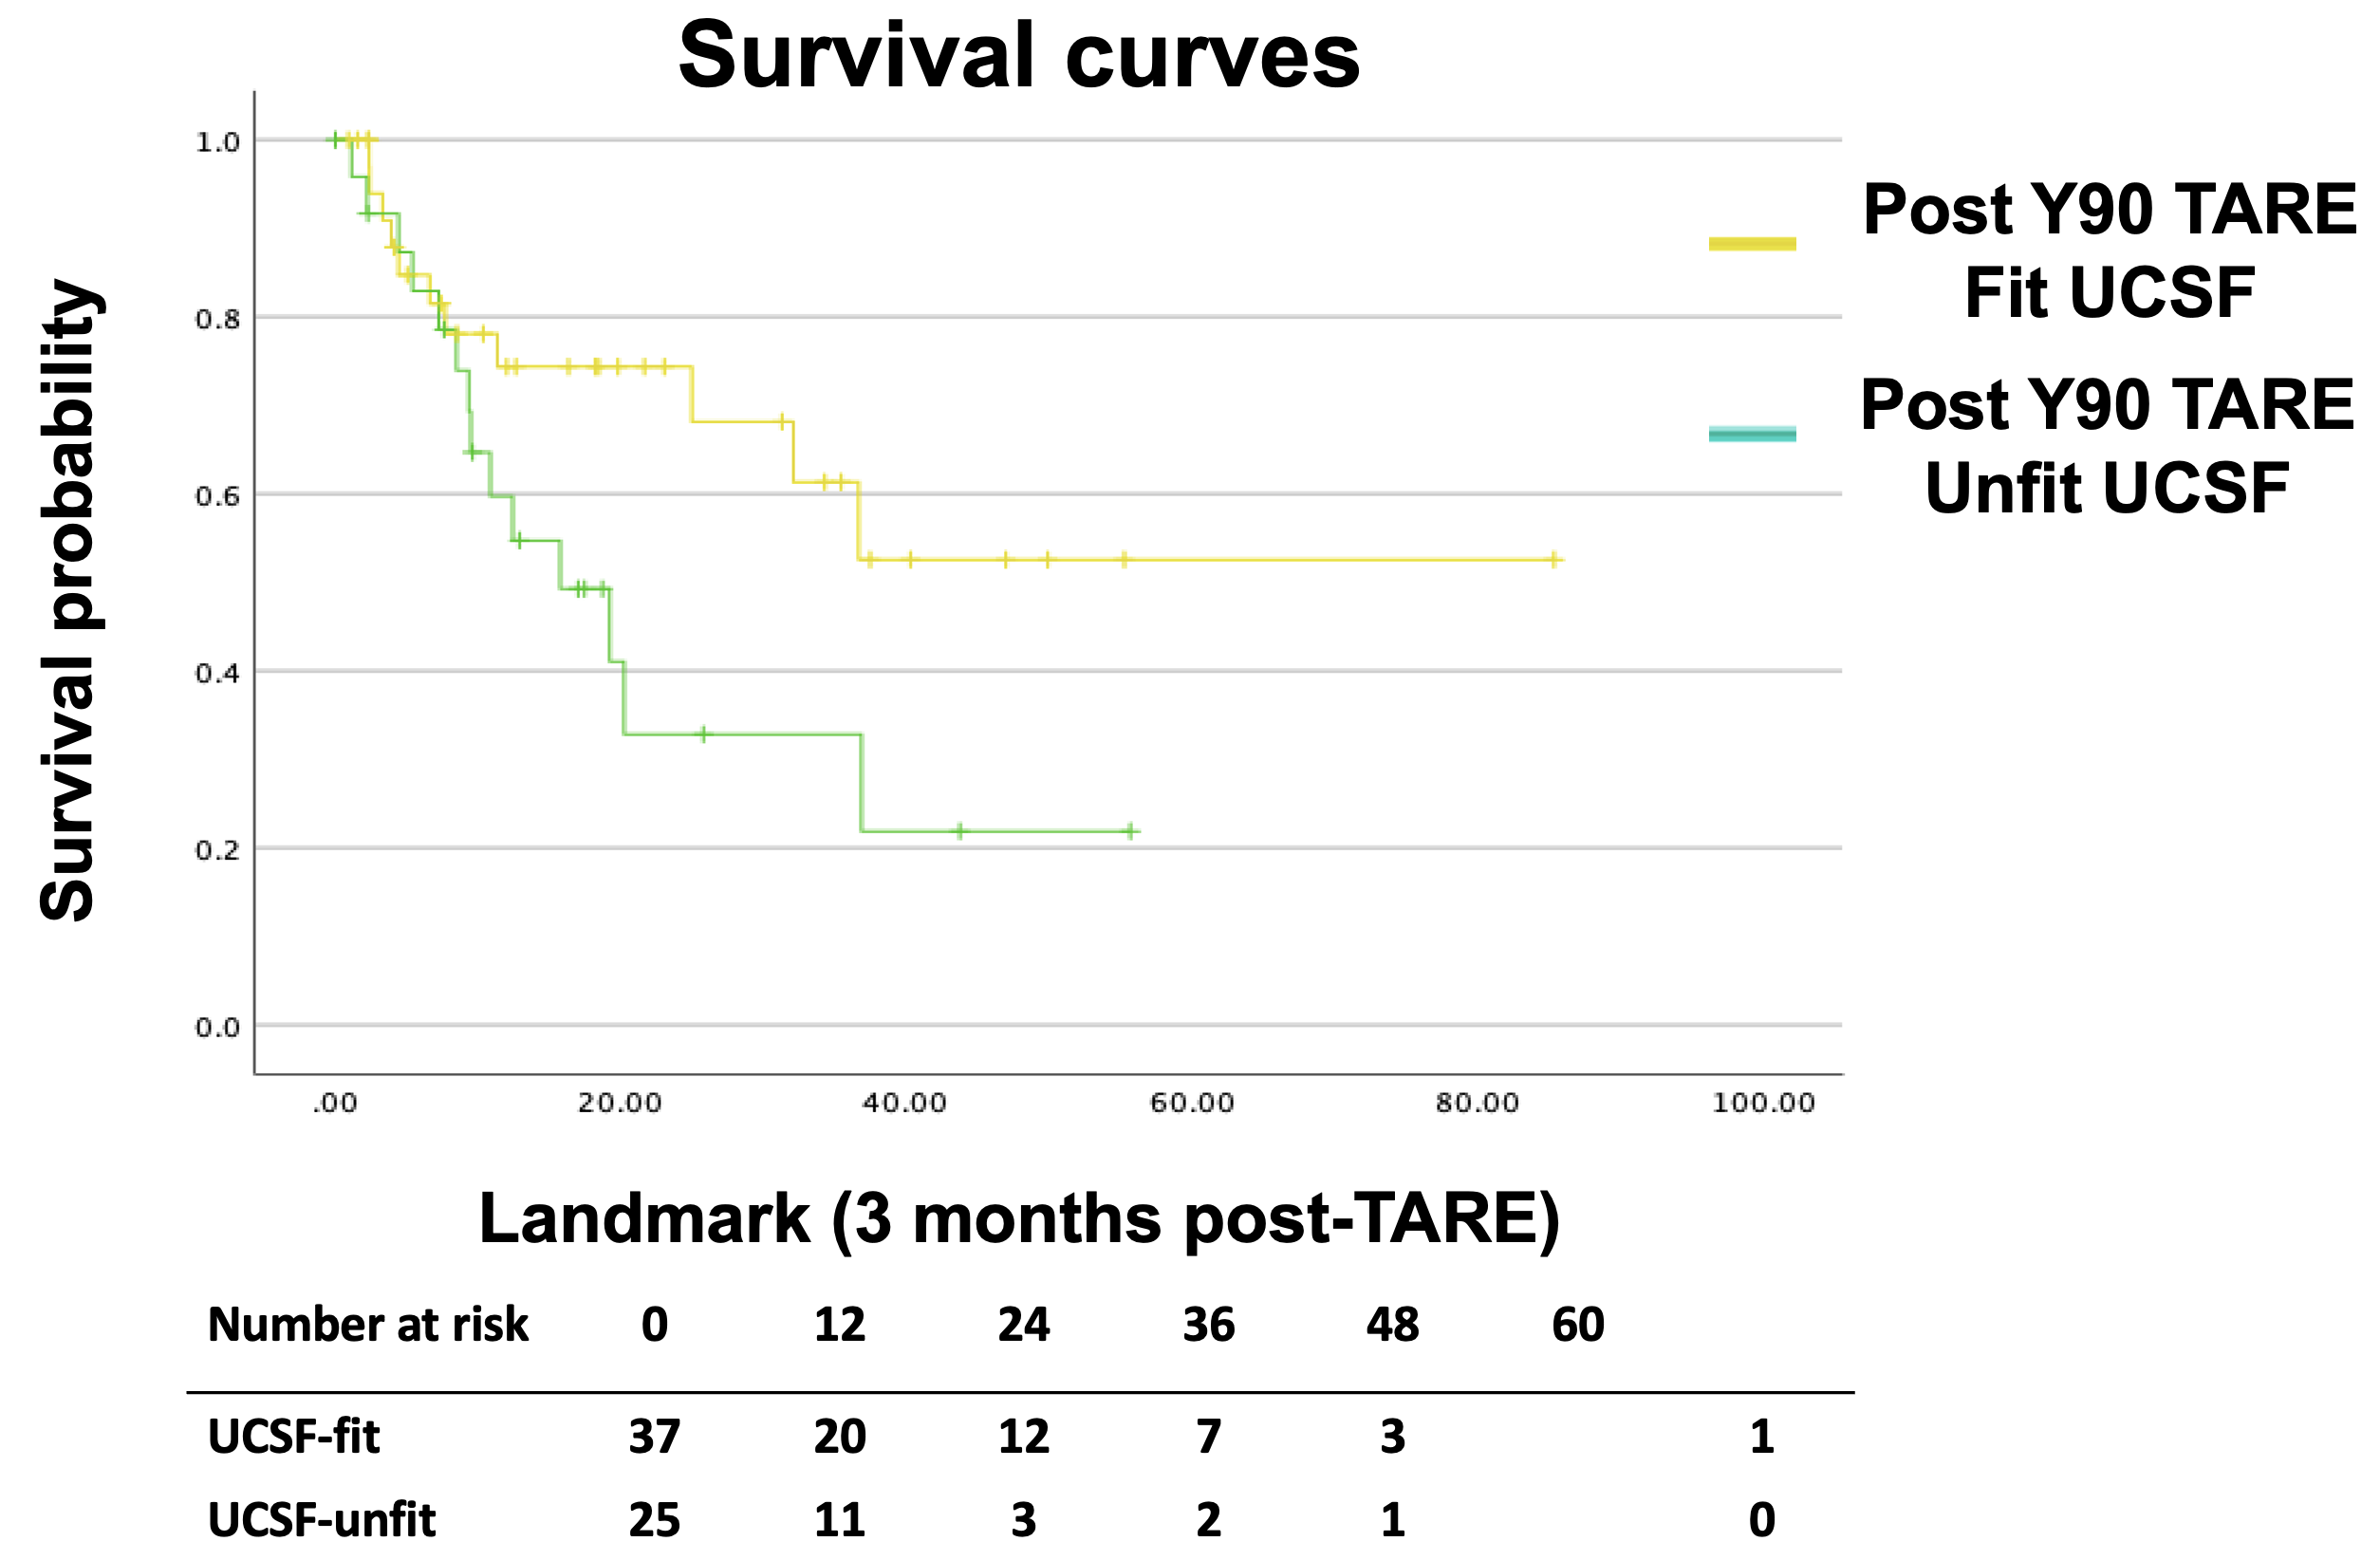


Supplementary Figure 1. Kaplan–Meier overall survival from the 3-month landmark, stratified by post-TARE UCSF status (fit vs unfit). Patients who died within 3 months after TARE were excluded to mitigate time-dependent bias (landmark at 3 months, aligned with response assessment). The landmark population included n=37 in the UCSF-fit group and n=25 in the UCSF-unfit group. Survival separation was attenuated but remained directionally consistent (log-rank p=0.053)

Supplementary Table 1 Sensitivity analysis using ROC-derived tumor size cut-off (≥7.8 cm)

| Variable | Odds ratio (OR) | 95% CI | p value |
| --- | --- | --- | --- |
| **Largest tumor size ≥ 7.8 cm** | **4.53** | **1.50–13.66** | **0.007＊** |
| ALBI grade (2 vs 1) | 1.23 | 0.38–4.02 | 0.733 |

**Model statistics**: Omnibus χ² = 8.38, p = 0.015; Nagelkerke R² = 0.163

**＊**Statistically significant difference.

Supplementary Table 2 Interaction analysis between tumor size and tumor number for successful downstaging

**Outcome:** Successful downstaging to within UCSF criteria (Yes = 1)

| Variable | Odds ratio (OR) | 95% CI | p value |
| --- | --- | --- | --- |
| **Tumor number (per lesion)** | 1.03 | **0.94 - 1.13** | **0.49** |
| Largest tumor diameter ≥ 7.8 cm | 0.14 | 0.03 – 0.76 | 0.023 |
| Size × number interaction | 0.95 | 0.78 – 1.15 | 0.612 |

**Model fit:** Omnibus χ² = 8.78, p = 0.032; Nagelkerke R² = 0.17
